# Supplementary material
Source: PubMed Central journal article supplement (PMC8129735)
Supplement: mmc1.pdf [file mmc1.pdf]

# Corticosteroid Therapy Is Associated With Improved Outcome in Critically Ill Patients With COVID-19 With Hyperinflammatory Phenotype

*Hui Chen, MD; Jianfeng Xie, MD; Nan Su, MD; Jun Wang, MD; Qin Sun, PhD; Shusheng Li, MD; Jun Jin, MD; Jing Zhou, MD; Min Mo, MD; Yao Wei, MD; Yali Chao, MD; Weiwei Hu, MD; Bin Du, MD; and Haibo Qiu, MD*

CHEST 2021; 159(5):1793-1802

*Online supplements are not copyedited prior to posting and the author(s) take full responsibility for the accuracy of all data.*

© 2021 AMERICAN COLLEGE OF CHEST PHYSICIANS. Reproduction of this article is prohibited without written permission from the American College of Chest Physicians. See online for more details. DOI: 10.1016/j.chest.2020.11.050

## **e-Appendix 1.**

### **e-Method**

#### **Marginal structural Cox models (MSCM)**

Marginal structural cox models (MSCM) are a new class of causal models for the estimation, from observational data, of the causal effect of a time-dependent exposure in the presence of time-dependent covariates that may be simultaneously confounders and intermediate variables. In our study, because corticosteroid therapy often was not started at the time of ICU admission, but rather during the course of the disease based on a change in the patient condition, so we used MSCM to provide the marginal causal relation between a time-varying exposure (Corticosteroid therapy) and a survival outcome (time to death), controlling for time-dependent variables (SPO<sub>2</sub>/FiO<sub>2</sub> and model of ventilation) that are likely to influence the corticosteroid therapy initiation and at the same time are likely to be correlated with the risk of mortality. The parameters of MSCM could be estimated using inverse probability weighting (IPW) to correct both for confounding and for forms of selection bias such as informative censoring. By weighting each patient by IPW, two pseudo-populations are created, similar with regards to baseline and time-dependent confounding factors, and different in corticosteroid exposure. The MSCM allows a comparison of hazard functions for patients who had not received corticosteroids to those who had received corticosteroids. The partial likelihood function of Cox model was modified such that the contribution of patient *i* to the risk set was weighted by the stabilized inverse probability of treatment selection and censoring weights<sup>1</sup>. The analytical pipeline of MSCM had three steps.

First, the treatment selection weights are calculated according to a ratio of two weights, the numerator is the product of probabilities that a patient receives his observed treatment at time *k*, given the baseline confounders (age, sex, days from the onset of symptom to hospital admission, SOFA score on Day 1, respiratory rate, hypertension, coronary heart disease, diabetes, chronic obstructive pulmonary disease, and the mode of ventilation on Day 1), the denominator is calculated similarly by incorporating also the time-dependent variables (SPO<sub>2</sub>/FiO<sub>2</sub> and model of ventilation) as

well. The weights are updated until the first day of corticosteroid therapy and kept constant afterwards. Second, the censoring weights are calculated in the same approach. We have censored patients at day 28. Third, the overall stabilized weight for each observation is obtained by multiplying the treatment selection weights and the censoring weights, and a MSCM was fit using robust variance estimator, and time-dependent variables were included in the model<sup>2</sup>. The ipw package (version 1.0–11) was employed for the MSCM analysis<sup>3</sup>.

### **References:**

1. Karim ME, Gustafson P, Petkau J, et al.: Marginal structural Cox models for estimating the association between  $\beta$ -interferon exposure and disease progression in a multiple sclerosis cohort. *Am J Epidemiol.* 2014; 180:160–171.
2. Hernán MA, Brumback B, Robins JM: Marginal structural models to estimate the causal effect of zidovudine on the survival of HIV-positive men. *Epidemiology.* 2000; 11:561–570
3. van der Wal WM, Geskus RB: ipw: An R Package for Inverse Probability Weighting. *Journal of Statistical Software.* 2011; 43:1–23

### **Statistical analyses**

#### **Subgroup analyses and sensitivity analyses**

Several prespecified subgroup analyses were performed according to sex, age, comorbidity, SOFA score, SPO<sub>2</sub>/FiO<sub>2</sub> and invasive mechanical ventilation use. Considering that the corticosteroid therapy effect may vary according to the dosage and the time of initiation, we conducted serial sensitivity analyses based on the following groups: patients who received a maximum daily doses of 40 mg (methylprednisolone-equivalent); patients who received a maximum daily doses of 80 mg (methylprednisolone-equivalent); patients who had corticosteroid therapy initiated within the first 4 days from hospital admission, each compared to patients who did not receive any corticosteroid therapy. We also compared corticosteroid therapy initiated after day 4 compared to patients who did not receive any corticosteroid therapy and were alive after day 4. To explore whether imputation of

missing data had an impact on the association observed in the MSCM, given that 91.4% of patients initialized corticosteroid therapy within 7 days when imputation was relatively limited, we compared patients who had corticosteroid therapy initiated within the first 7 days with patients in the no corticosteroid therapy group with imputation up to day 7 only.

### **Parsimonious model to predict phenotype**

A biomarker-based parsimonious model was shown to have high accuracy in predicting phenotypes of ARDS. Based on the previous research, we attempt to construct a three variable model to predict phenotype of COVID-19, variables were chosen because they contributed most significantly to defining phenotypes using forward stepwise modeling. Receiver operator characteristics (ROC) and area under the curve (AUC) were calculated for the model. Subjects with missing data were excluded.

**e-Table 1:** Baseline and time-dependent variables in marginal structural Cox model

| Baseline variables                               | Time-dependent variables                       |
|--------------------------------------------------|------------------------------------------------|
| Age                                              | SPO <sub>2</sub> /FI <sub>O</sub> <sub>2</sub> |
| Sex (Female)                                     | Model of ventilation*                          |
| Days from onset of symptom to hospital admission |                                                |
| SOFA score on Day 1                              |                                                |
| Respiratory rate                                 |                                                |
| Hypertension                                     |                                                |
| Coronary heart disease                           |                                                |
| Diabetes                                         |                                                |
| COPD                                             |                                                |
| Mode of ventilation on Day 1*                    |                                                |

\*we coded the mode of ventilation as follows: 0=no ventilation, 1=non-invasive ventilation, 2=invasive ventilation, 3= advanced ventilation support (e.g. ECMO, oscillatory, prone)

SOFA=Sequential Organ Failure Assessment; COPD=chronic obstructive pulmonary disease; SPO<sub>2</sub>/FI<sub>O</sub><sub>2</sub> ratio= ratio of pulse oxygen saturation to the fractional concentration of oxygen in inspired air.

**e-Table 2. Percentage of missing data in the variables of interest**

|                                                        | Missing, n (%) |
|--------------------------------------------------------|----------------|
| Age, years                                             | 1 (0.2%)       |
| Sex (Female)                                           | 0 (0)          |
| Days from onset of symptom to Hospital admission, days | 0 (0)          |
| Fever (temperature > 37.3°C)                           | 0 (0)          |
| Dyspnea                                                | 0 (0)          |
| SOFA score                                             | 0 (0)          |
| Hypertension                                           | 0 (0)          |
| Coronary heart disease                                 | 0 (0)          |
| Chronic heart failure                                  | 0 (0)          |
| Diabetes                                               | 0 (0)          |
| COPD                                                   | 0 (0)          |
| Chronic renal diseases                                 | 0 (0)          |
| Liver disease                                          | 0 (0)          |
| Malignancy                                             | 0 (0)          |
| Immunodeficiency                                       | 0 (0)          |
| Temperature, °C                                        | 3 (0.7%)       |
| Heart rate, beats per min                              | 1 (0.2%)       |
| Respiratory rate, breaths per min                      | 2 (0.46%)      |
| MAP, mmHg                                              | 1 (2.3%)       |
| SPO <sub>2</sub> /FiO <sub>2</sub> ratio               | 25 (5.8%)      |
| White blood cell count, ×10 <sup>9</sup> per L         | 10 (2.3%)      |
| Lymphocyte count, ×10 <sup>9</sup> per L               | 12 (2.8%)      |
| Platelet count, ×10 <sup>9</sup> per L                 | 28 (6.5%)      |
| Haemoglobin, g/L                                       | 14 (3.3%)      |
| Erythrocyte sedimentation rate, mm/h                   | 117 (27.3%)    |
| High-sensitive C-reactive protein, mg/L                | 23 (5.4%)      |
| Procalcitonin, ng/mL                                   | 103 (24%)      |
| Interleukin-1β, pg/ml                                  | 86 (20.1%)     |
| Interleukin-2R, U/ml                                   | 83 (19.4%)     |
| Interleukin-6, pg/ml                                   | 80 (18.7%)     |
| Interleukin-8, pg/ml                                   | 83 (19.4%)     |
| Interleukin-10, pg/ml                                  | 83 (19.4%)     |
| TNF-α, pg/ml                                           | 83 (19.4%)     |
| Antiviral treatment                                    | 0 (0)          |
| Antibiotics                                            | 0 (0)          |
| Intravenous immunoglobulin                             | 0 (0)          |
| Neuromuscular blockade                                 | 0 (0)          |
| High-flow nasal cannula oxygen therapy                 | 0 (0)          |
| Non-invasive mechanical ventilation                    | 0 (0)          |
| Invasive mechanical ventilation                        | 0 (0)          |

# CHEST™ Online Supplement

|                           |       |
|---------------------------|-------|
| ECMO                      | 0 (0) |
| Renal replacement therapy | 0 (0) |
| Any vasopressor           | 0 (0) |
| ARDS                      | 0 (0) |
| Septic shock              | 0 (0) |
| Coagulopathy              | 0 (0) |
| Acute kidney injury       | 0 (0) |
| Acute cardiac injury      | 0 (0) |
| 28-day mortality          | 0 (0) |
| Hospital duration, days   | 0 (0) |

---

SOFA=Sequential Organ Failure Assessment; COPD=chronic obstructive pulmonary disease; MAP=mean arterial pressure; SPO<sub>2</sub>/FiO<sub>2</sub> ratio= ratio of pulse oxygen saturation to the fractional concentration of oxygen in inspired air; TNF- $\alpha$ = tumour necrosis factor- $\alpha$ ; ECMO=extracorporeal membrane oxygenation; ARDS=acute respiratory distress syndrome.

**e-Table 3. Additional baseline characteristics between corticosteroid group and no corticosteroid group**

|                                  | No Corticosteroid   | Corticosteroid      | p value | SMD   |
|----------------------------------|---------------------|---------------------|---------|-------|
| PT, s                            | 14.0 (13.3-15.0)    | 14.6 (13.7-16.0)    | <0.0001 | 0.029 |
| APTT, s                          | 40.3 (36.1-44.0)    | 40.7 (35.7-45.7)    | 0.80    | 0.067 |
| D-dimer, µg/ml                   | 0.9 (0.4-2.6)       | 1.8 (0.8-12.3)      | <0.0001 | 0.345 |
| Fib, g/L                         | 4.4 (3.6-5.7)       | 5.0 (4.0-6.0)       | 0.042   | 0.197 |
| INR                              | 1.1 (1.0-1.2)       | 1.1 (1.0-1.3)       | <0.0001 | 0.128 |
| Hypersensitive troponin I, pg/ml | 3.3 (1.9-15.3)      | 13.6 (4.4-130.0)    | <0.0001 | 0.249 |
| Myohemoglobin, ng/ml             | 46.1 (22.9-111.6)   | 128.2 (58.7-201.7)  | <0.0001 | 0.147 |
| Creatine kinase-MB, U/L          | 1.0 (0.4-2.5)       | 2.2 (1.0-6.0)       | 0.00060 | 0.030 |
| ALT, IU/L                        | 21.0 (14.0-36.0)    | 29.0 (17.0-46.0)    | 0.00040 | 0.062 |
| AST, IU/L                        | 26.0 (20.0-39.0)    | 38.0 (24.0-57.0)    | <0.0001 | 0.039 |
| Albumin, g/L                     | 35.6 (31.0-38.6)    | 32.5 (29.5-35.9)    | <0.0001 | 0.251 |
| Total bilirubin, µmol/L          | 8.6 (6.3-12.5)      | 11.0 (7.8-16.7)     | 0.00010 | 0.003 |
| Creatinine, µmol/L               | 65.5 (53.0-89.0)    | 77.0 (61.5-96.5)    | 0.0025  | 0.067 |
| Urea nitrogen, mmol/L            | 4.7 (3.4-7.1)       | 6.1 (4.3-9.5)       | 0.00020 | 0.011 |
| Creatine kinase, U/L             | 76.0 (41.5-188.3)   | 129.0 (68.0-291.0)  | 0.027   | 0.008 |
| Lactate dehydrogenase, U/L       | 244.5 (194.3-319.3) | 427.5 (302.0-568.0) | <0.0001 | 0.794 |
| eGFR, ml/min                     | 93.6 (75.8-109.20)  | 82.1 (66.9-96.8)    | <0.0001 | 0.373 |
| Sodium, mmol/L                   | 140.4 (137.8-142.8) | 138.5 (135.8-142.0) | 0.0017  | 0.203 |
| Potassium, mmol/L                | 4.2 (3.9-4.5)       | 4.3 (3.8-4.7)       | 0.81    | 0.038 |
| Chlorine, mmol/L                 | 102.2 (100.2-104.5) | 100.4 (97.2-103.4)  | <0.0001 | 0.295 |
| Glucose, mmol/L                  | 6.0 (5.1-7.2)       | 7.7 (6.2-10.3)      | <0.0001 | 0.432 |

PT=Prothrombin time; APTT=Activated partial thromboplastin time; Fib= Fibrinogen; INR= International Normalized Ratio; ALT=Alanine transaminase; AST= Aspartate transaminase; eGFR= glomerular filtration rate.

**e-Table 4. Multivariate Cox proportional-hazards regression model assessing the impact of corticosteroid therapy on 28-day mortality in patients with COVID-19.**

|                                                  | HR        | Lower.95 | Upper.95 | p value   |
|--------------------------------------------------|-----------|----------|----------|-----------|
| Corticosteroid therapy                           | 1.97      | 1.25     | 3.11     | 0.0034    |
| Age                                              | 1.02      | 1.00     | 1.04     | 0.0018    |
| Sex (Female)                                     | 0.66      | 0.48     | 0.91     | 0.011     |
| Days from onset of symptom to hospital admission | 1.01      | 0.99     | 1.03     | 0.25      |
| SOFA score on Day 1                              | 1.46      | 1.37     | 1.55     | <0.0001   |
| Respiratory rate                                 | 0.98      | 0.96     | 1.00     | 0.19      |
| Hypertension                                     | 0.95      | 0.67     | 1.33     | 0.77      |
| Coronary heart disease                           | 1.02      | 0.64     | 1.63     | 0.93      |
| Diabetes                                         | 1.37      | 0.93     | 2.02     | 0.11      |
| COPD                                             | 2.18      | 1.21     | 3.91     | 0.0092    |
| Mode of ventilation on Day 1 (0)*                | Reference | —        | —        | Reference |
| Mode of ventilation on Day 1 (1)                 | 1.42      | 0.98     | 2.04     | 0.062     |
| Mode of ventilation on Day 1 (2)                 | 1.93      | 1.03     | 3.62     | 0.041     |
| Mode of ventilation on Day 1 (3)                 | 0.61      | 0.14     | 2.67     | 0.51      |

\*we coded the mode of ventilation as follows: 0=no ventilation, 1=non-invasive ventilation, 2=invasive ventilation, 3= advanced ventilation support (e.g. ECMO, oscillatory, prone)  
SOFA=Sequential Organ Failure Assessment; COPD=chronic obstructive pulmonary disease.

**e-Table 5. Univariate and multivariate models assessing impact of variables on classification of phenotypes.**

| Variables     | Univariate models   |         | Multivariate models |         |
|---------------|---------------------|---------|---------------------|---------|
|               | Odds Ratio (95% CI) | P value | Odds Ratio (95% CI) | P value |
| TNF- $\alpha$ | 1.18 (1.12-1.24)    | <0.001  | 1.16 (1.08-1.24)    | <0.001  |
| D-dimer       | 1.61 (1.40-1.86)    | <0.001  | 1.32 (1.16-1.49)    | <0.001  |
| NLR           | 1.42 (1.32-1.53)    | <0.001  | 1.30 (1.21-1.40)    | <0.001  |

TNF- $\alpha$ = tumour necrosis factor- $\alpha$ ; NLR= neutrophil to lymphocyte ratio.



**e-Table 6. Association between corticosteroids therapy and 28-day mortality in patients with COVID-19 using various adjustment methodologies.**

| Variables                                                                                       | Cox proportional hazard model |                     |         | Marginal structural modeling |                     |         |
|-------------------------------------------------------------------------------------------------|-------------------------------|---------------------|---------|------------------------------|---------------------|---------|
|                                                                                                 | Number of patients            | HR (95% CI)         | p value | Number of patients           | HR (95% CI)         | p value |
| Patients treated with 40 mg (maximum daily dosage) vs not treated with corticosteroids (ref)    | 275                           | 2.85<br>(1.68-4.85) | <0.001  | 275                          | 1.00<br>(0.56-1.80) | 0.98    |
| Patients treated with 80 mg (maximum daily dosage) vs not treated with corticosteroids (ref)    | 262                           | 1.33<br>(0.76-2.33) | 0.31    | 262                          | 0.87<br>(0.49-1.54) | 0.62    |
| Patients treated for ≤ 4 days vs not treated with corticosteroids (ref)                         | 375                           | 2.05<br>(1.30-3.22) | 0.0018  | 375                          | 0.78<br>(0.44-1.03) | 0.071   |
| Patients treated for >4 days vs not treated with corticosteroids and who survived >4 days (ref) | 198                           | 1.14<br>(0.50-2.60) | 0.75    | 198                          | 1.97<br>(0.92-4.22) | 0.082   |

HR= hazard ratio

**e-Table 7. Clinical characteristics and outcomes between hypoinflammatory and hyperinflammatory phenotype**

|                                                        | Hypoinflammatory phenotype | hyperinflammatory phenotype | p value | SMD   |
|--------------------------------------------------------|----------------------------|-----------------------------|---------|-------|
| N                                                      | 223                        | 205                         |         |       |
| Age, years                                             | 58.0 (48.0-68.0)           | 68.0 (59.0-75.0)            | <0.0001 | 0.644 |
| Sex (Female)                                           | 114 (51.4%)                | 87 (42.4%)                  | 0.081   | 0.179 |
| Days from onset of symptom to Hospital admission, days | 11.0 (8.0-16.0)            | 12.0 (8.0-16.0)             | 0.41    | 0.043 |
| Fever (temperature>37.3°C)                             | 192 (86.1%)                | 184 (89.8%)                 | 0.31    | 0.112 |
| Dyspnea                                                | 129 (57.8%)                | 139 (67.8%)                 | 0.043   | 0.207 |
| SOFA score                                             | 2.0 (1.0-3.0)              | 7.0 (4.0-9.0)               | <0.0001 | 1.599 |
| <b>Comorbidity</b>                                     |                            |                             |         |       |
| Hypertension                                           | 78 (35.0%)                 | 98 (48.0%)                  | 0.0083  | 0.267 |
| Coronary heart disease                                 | 18 (8.1%)                  | 30 (14.7%)                  | 0.046   | 0.209 |
| Chronic heart failure                                  | 4 (1.8%)                   | 16 (7.8%)                   | 0.0064  | 0.285 |
| Diabetes                                               | 33 (14.8%)                 | 48 (23.6%)                  | 0.028   | 0.226 |
| COPD                                                   | 8 (3.6%)                   | 12 (5.9%)                   | 0.37    | 0.108 |
| Chronic renal diseases                                 | 1 (0.4%)                   | 3 (1.5%)                    | 0.35    | 0.105 |
| Liver disease                                          | 2 (0.9%)                   | 8 (3.9%)                    | 0.053   | 0.198 |
| Malignancy                                             | 8 (3.6%)                   | 5 (2.5%)                    | 0.69    | 0.066 |
| Immunodeficiency                                       | 3 (1.3%)                   | 3 (1.5%)                    | 1.0     | 0.011 |
| Temperature, °C                                        | 36.8 (36.5-37.5)           | 36.9 (36.5-38.0)            | 0.25    | 0.110 |
| Heart rate, beats per min                              | 89.0 (80.0-102.0)          | 93.0 (81.0-108.0)           | 0.016   | 0.304 |
| Respiratory rate, breaths per min                      | 20.0 (20.0-22.0)           | 23.0 (20.0-30.0)            | <0.0001 | 0.515 |
| MAP, mmHg                                              | 96.7 (90.7-105.0)          | 98.5 (87.9-105.7)           | 0.60    | 0.050 |
| SPO <sub>2</sub> /FiO <sub>2</sub> ratio               | 297.0 (154.0-274.5)        | 167 (122.0-230.0)           | <0.0001 | 1.517 |
| White blood cell count, ×10 <sup>9</sup> per L         | 5.1 (3.9-6.4)              | 9.8 (7.4-13.3)              | <0.0001 | 1.391 |
| Lymphocyte count, ×10 <sup>9</sup> per L               | 1.0 (0.7-1.5)              | 0.6 (0.4-0.8)               | <0.0001 | 0.906 |
| NLR                                                    | 3.2 (1.9-5.1)              | 14.9 (8.6-25.5)             | <0.0001 | 1.131 |
| Platelet count, ×10 <sup>9</sup> per L                 | 209.0 (154.0-274.5)        | 167.0 (122.0-230.0)         | <0.0001 | 0.455 |
| Haemoglobin, g/L                                       | 126.0 (114.5-137.0)        | 128.0 (113.5-143.0)         | 0.12    | 0.145 |
| High-sensitive C-reactive protein, mg/L                | 23.6 (5.3-57.5)            | 92.1 (55.9-142.7)           | <0.0001 | 0.193 |
| Interleukin-1β, pg/ml                                  | 5.0 (5.0-5.0)              | 5.0 (5.0-5.0)               | 0.23    | 0.141 |
| Interleukin-2R, U/ml                                   | 587.0 (404.5-829.5)        | 1128.0 (830.0-1530.0)       | <0.0001 | 1.028 |
| Interleukin-6, pg/ml                                   | 5.8 (1.7-19.4)             | 64.9 (30.8-138.7)           | <0.0001 | 0.444 |
| Interleukin-8, pg/ml                                   | 10.1 (5.9-17.7)            | 30.3 (18.1-68.3)            | <0.0001 | 0.361 |
| Interleukin-10, pg/ml                                  | 5.0 (5.0-6.6)              | 8.9 (5.2-15.0)              | <0.0001 | 0.250 |
| TNF-α, pg/ml                                           | 7.4 (5.5-9.6)              | 11.5 (8.4-17.5)             | <0.0001 | 0.547 |
| D-dimer, μg/ml                                         | 0.7 (0.4-21.3)             | 6.1 (1.8-21.0)              | <0.0001 | 1.201 |
| Corticosteroid therapy                                 | 111 (49.7%)                | 169 (82.4%)                 | <0.0001 | 1.292 |

**Treatments**

|                                        |             |             |         |       |
|----------------------------------------|-------------|-------------|---------|-------|
| Antiviral treatment                    | 196 (87.9%) | 154 (75.1%) | 0.0011  | 0.333 |
| Antibiotics                            | 158 (70.9%) | 191 (93.2%) | <0.0001 | 0.607 |
| Intravenous immunoglobulin             | 79 (35.4%)  | 141 (68.8%) | <0.0001 | 0.708 |
| Neuromuscular blockade                 | 12 (5.4%)   | 36 (17.6%)  | 0.00012 | 0.389 |
| High-flow nasal cannula oxygen therapy | 16 (7.2%)   | 47 (22.9%)  | <0.0001 | 0.452 |
| Non-invasive mechanical ventilation    | 24 (10.8%)  | 91 (44.4%)  | <0.0001 | 0.812 |
| Invasive mechanical ventilation        | 30 (13.5%)  | 130 (63.4%) | <0.0001 | 1.197 |
| ECMO                                   | 4 (1.8%)    | 18 (8.8%)   | 0.0023  | 0.316 |
| Renal replacement therapy              | 9 (4.0%)    | 35 (17.1%)  | <0.0001 | 0.434 |
| Any vasopressor                        | 24 (10.8%)  | 131 (63.9%) | <0.0001 | 1.315 |

**Outcomes**

|                      |            |             |         |       |
|----------------------|------------|-------------|---------|-------|
| ARDS                 | 46 (20.6%) | 168 (82.0%) | <0.0001 | 1.554 |
| Septic shock         | 29 (10.8%) | 131 (63.9%) | <0.0001 | 1.315 |
| Coagulopathy         | 12 (5.4%)  | 84 (41.0%)  | <0.0001 | 0.930 |
| Acute kidney injury  | 23 (10.3%) | 106 (51.7%) | <0.0001 | 1.001 |
| Acute cardiac injury | 32 (14.3%) | 133 (64.9%) | <0.0001 | 1.207 |
| 28-day mortality     | 34 (15.2%) | 146 (71.2%) | <0.0001 | 1.369 |

SOFA=Sequential Organ Failure Assessment; COPD=chronic obstructive pulmonary disease; MAP= mean arterial pressure; SPO<sub>2</sub>/FiO<sub>2</sub> ratio= ratio of pulse oxygen saturation to the fractional concentration of oxygen in inspired air; NLR= neutrophil to lymphocyte ratio; TNF- $\alpha$ = tumour necrosis factor- $\alpha$ ; PT=Prothrombin time; APTT=Activated partial thromboplastin time; Fib= Fibrinogen; INR= International Normalized Ratio; ALT=Alanine transaminase; AST= Aspartate transaminase; eGFR= glomerular filtration rate; ECMO=extracorporeal membrane oxygenation; ARDS=acute respiratory distress syndrome.

**e-Table 8. Results of marginal structural Cox model in overall population and phenotypes**

|                             | Number of patients | HR   | Lower.95 | Upper.95 | p value |
|-----------------------------|--------------------|------|----------|----------|---------|
| Overall population          | 428                | 0.80 | 0.54     | 1.18     | 0.26    |
| Hypoinflammatory phenotype  | 223                | 1.15 | 0.45     | 2.94     | 0.76    |
| hyperinflammatory phenotype | 205                | 0.51 | 0.34     | 0.78     | 0.0018  |

HR= hazard ratio

**e-Table 9. Subgroup analyses of the association between corticosteroid therapy and 28-day mortality in hyperinflammatory phenotype using MSCM**

|                                          | Number of patients | HR   | Lower.95 | Upper.95 | p value |
|------------------------------------------|--------------------|------|----------|----------|---------|
| Invasive Mechanical ventilation          |                    |      |          |          |         |
| Yes                                      | 130                | 0.51 | 0.30     | 0.84     | 0.006   |
| No                                       | 75                 | 0.45 | 0.21     | 0.97     | 0.042   |
| SPO <sub>2</sub> /FiO <sub>2</sub> ratio |                    |      |          |          |         |
| ≤150                                     | 114                | 0.30 | 0.13     | 0.68     | 0.004   |
| >150                                     | 91                 | 0.55 | 0.32     | 0.94     | 0.028   |

HR= hazard ratio; SOFA=Sequential Organ Failure Assessment; SPO<sub>2</sub>/FiO<sub>2</sub> ratio= ratio of pulse oxygen saturation to the fractional concentration of oxygen in inspired air.

**e-Table 10: The association between corticosteroid therapy and 28-day mortality in groups based on the cutoff value of TNF-α, D-dimer and NLR**

|         | Number of patients | HR   | Lower.95 | Upper.95 | p value |
|---------|--------------------|------|----------|----------|---------|
| TNF-α   |                    |      |          |          |         |
| >10.1   | 170                | 0.64 | 0.35     | 1.21     | 0.17    |
| ≤10.1   | 258                | 1.00 | 0.58     | 1.72     | 0.99    |
| D-dimer |                    |      |          |          |         |
| >2.0    | 180                | 0.58 | 0.34     | 0.98     | 0.042   |
| ≤2.0    | 248                | 1.07 | 0.55     | 2.06     | 0.84    |
| NLR     |                    |      |          |          |         |
| >6.9    | 212                | 0.55 | 0.34     | 0.89     | 0.015   |
| ≤6.9    | 216                | 1.22 | 0.59     | 2.52     | 0.59    |

HR= hazard ratio; NLR= neutrophil to lymphocyte ratio; TNF-α= tumour necrosis factor-α;

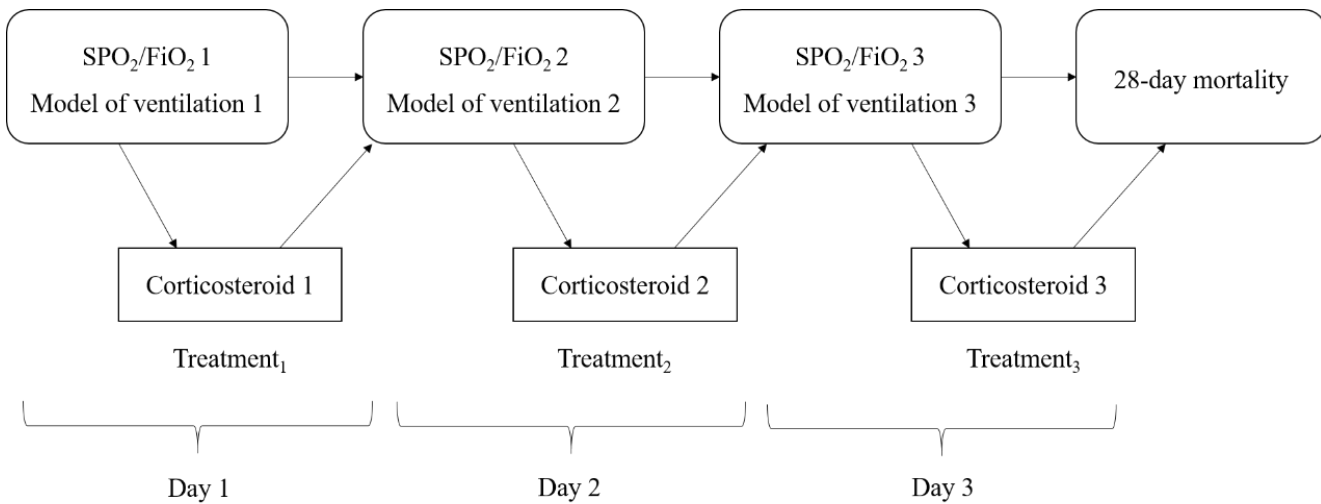

**e- Figure 1:** Causal diagram of corticosteroids therapy with 28-day mortality in marginal structural Cox model. Hypothetical relationship in the treatment of corticosteroids with 3 time points (days):  $j=1, 2, 3$ . Here Treatment <sub>$j$</sub>  means binary corticosteroids exposure variable that is measured immediately after the time-dependent confounders SPO<sub>2</sub>/FiO<sub>2</sub>  $j$  and model of ventilation  $j$ . The time-dependent confounder SPO<sub>2</sub>/FiO<sub>2</sub>  $j$  and model of ventilation  $j$  at time  $j$  are affected by prior treatment (Treatment <sub>$j-1$</sub> ). According to the causal diagram, SPO<sub>2</sub>/FiO<sub>2</sub> 1 and model of ventilation 1 imposes confounding on the Treatment<sub>1</sub>- 28day-mortality relationship, and SPO<sub>2</sub>/FiO<sub>2</sub> 2 and model of ventilation 2 is an intermediate variable for the same relationship, since the prior corticosteroids therapy may improve SPO<sub>2</sub>/FiO<sub>2</sub> or change the model of ventilation, which may improve the final mortality outcome.

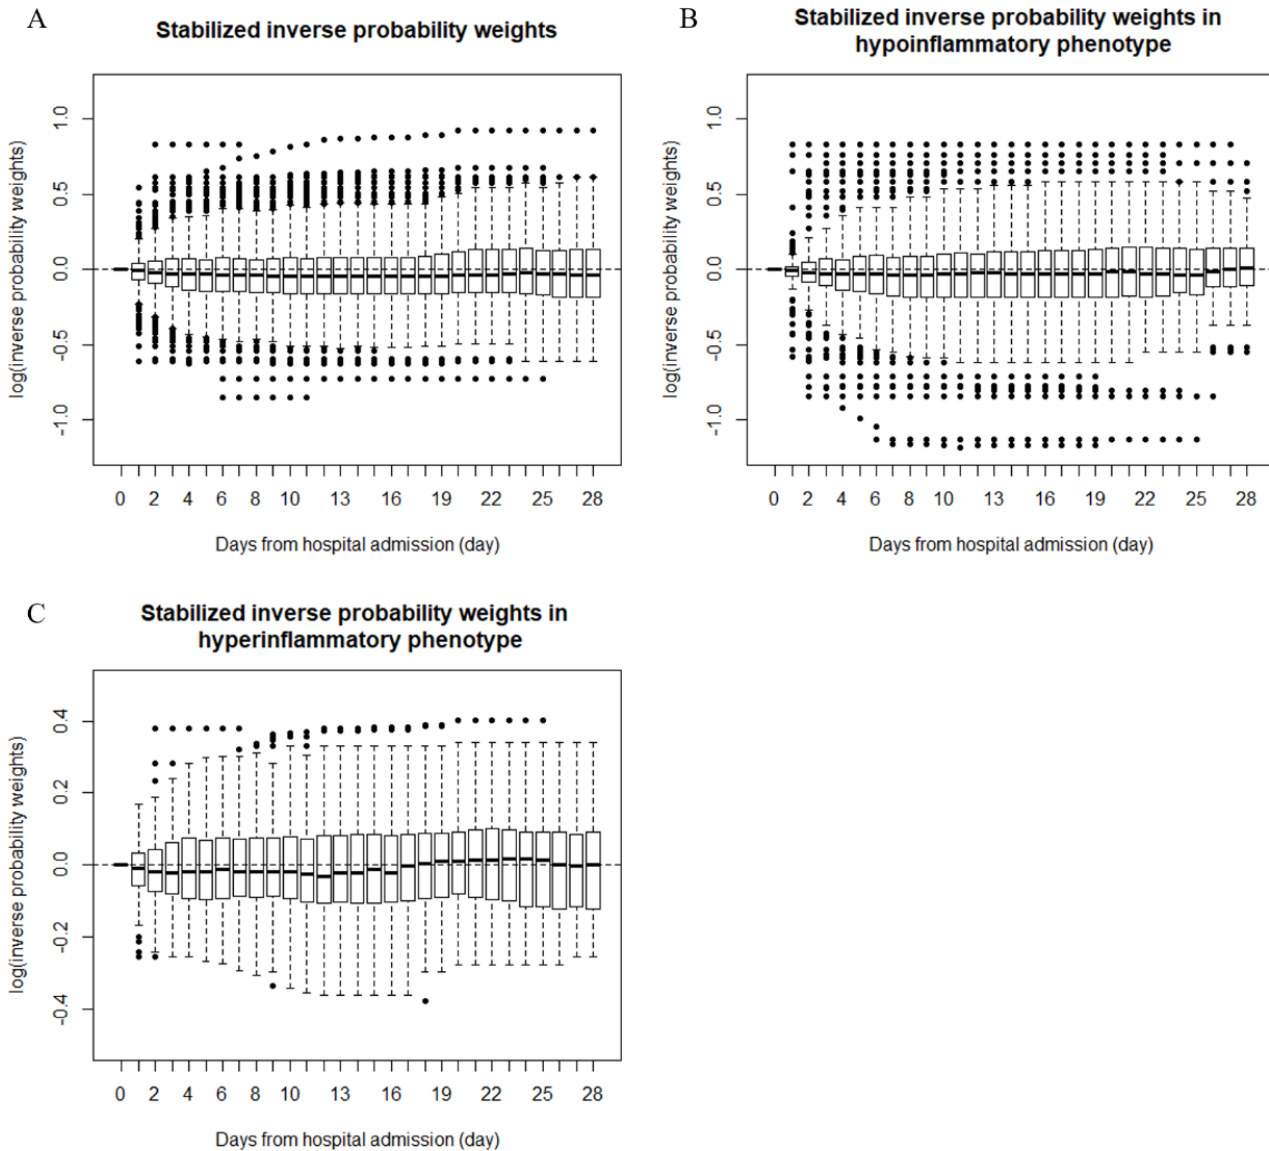

**e-Figure 2.** Weights distribution plot for the inverse probability weights that were used to adjust for confounding in overall group (A), patients with hypoinflammatory phenotype (B) and patients with hyperinflammatory phenotype (C).

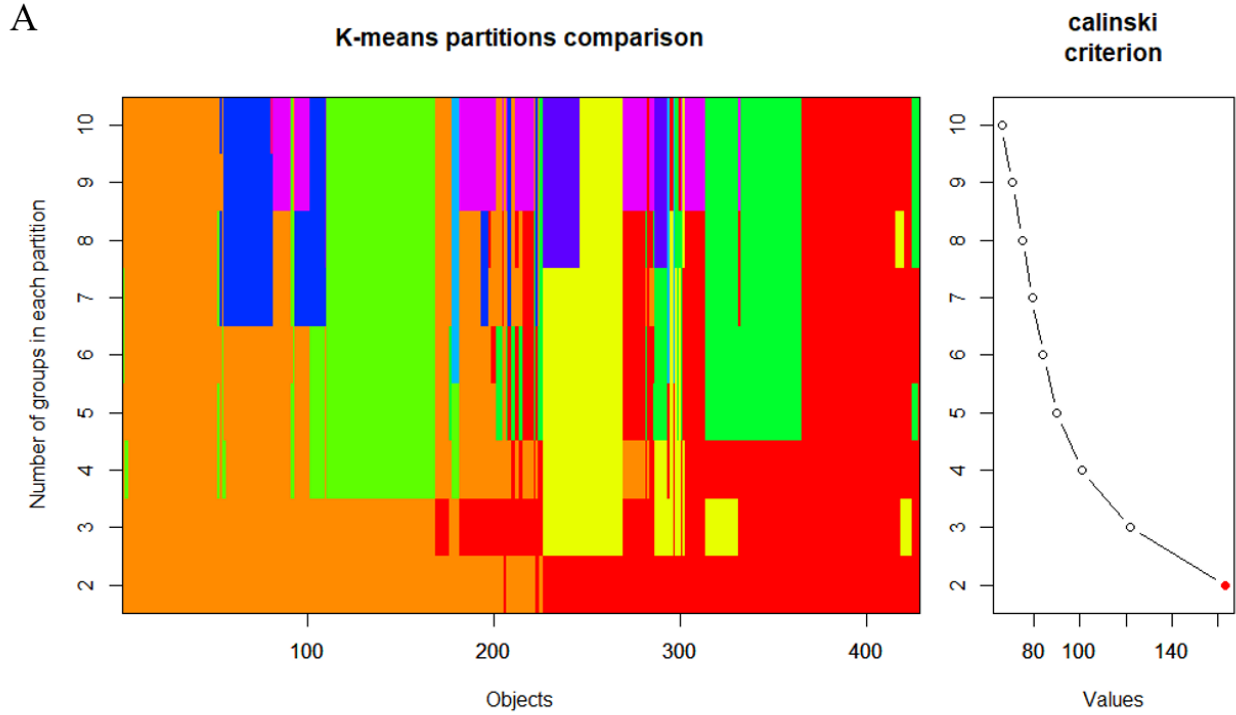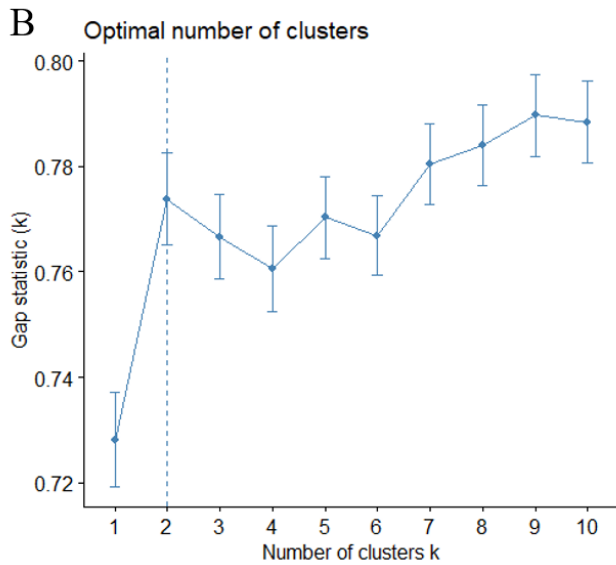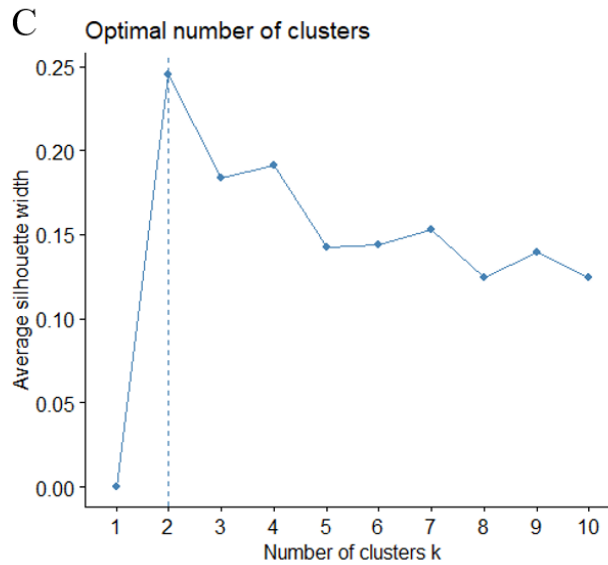

**e-Figure 3.** Estimating the optimal number of clusters using calinsky criterion (A), gap statistics (B) and average silhouette method (C).

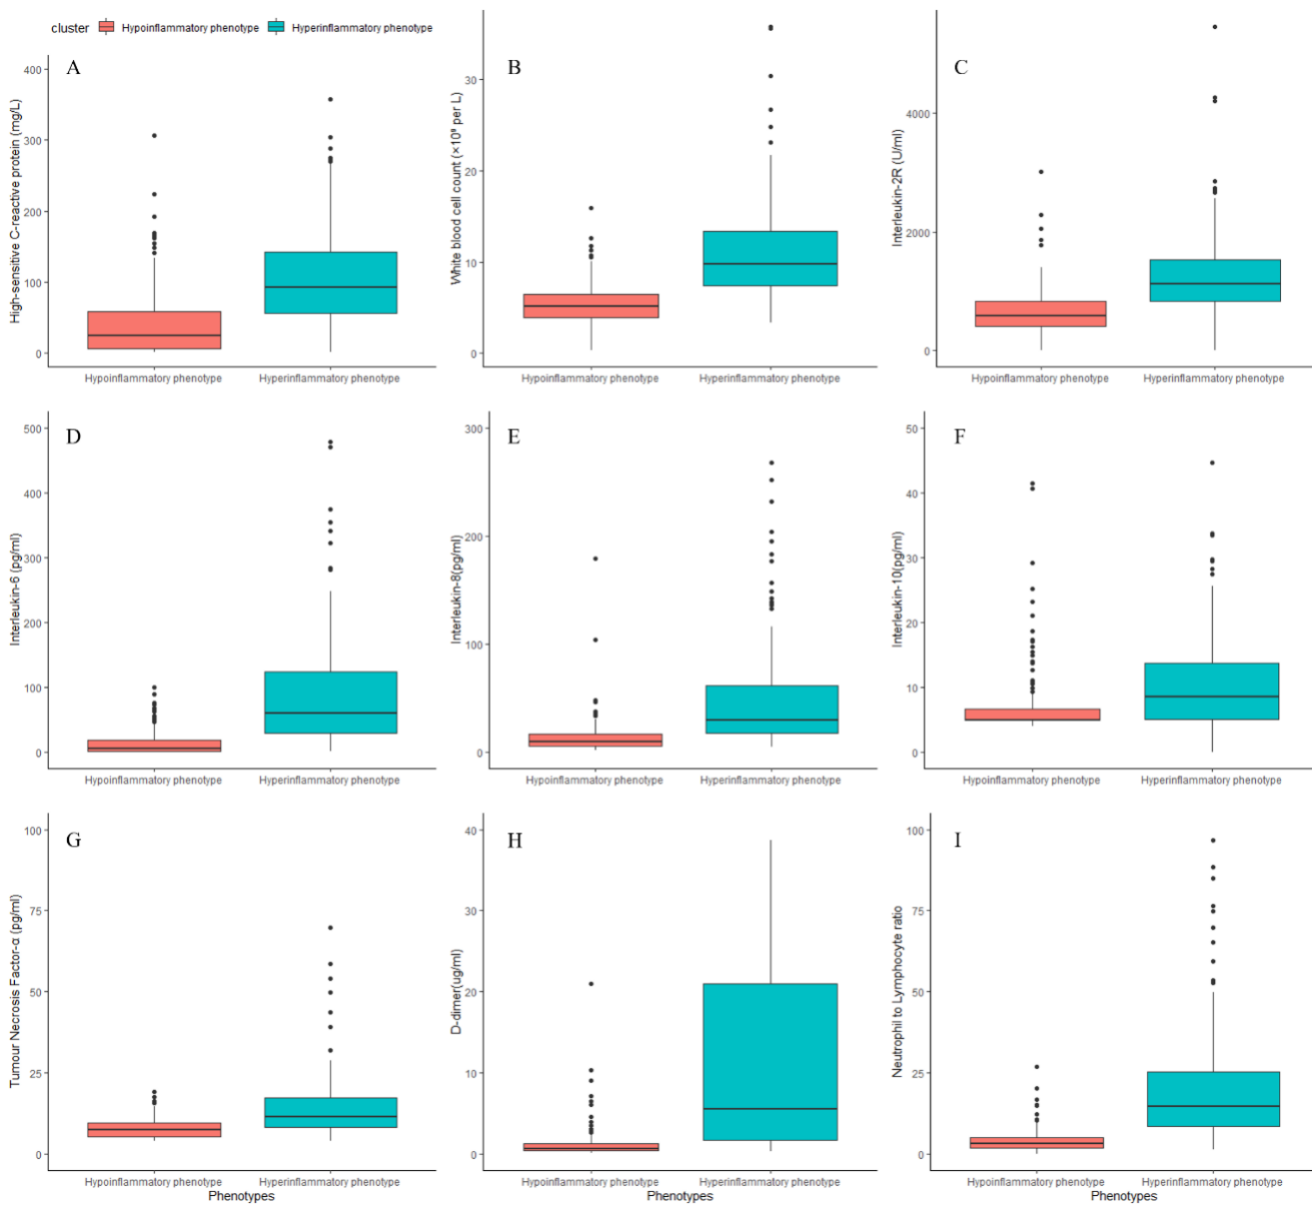

**e-Figure 4.** Difference in key variable between the hyperinflammatory and hypoinflammatory phenotypes. Figure shows the differences in High-sensitive C-reactive protein (A), White blood cell count (B), Interleukin-2R (C), Interleukin-6 (D), Interleukin-8 (E), Interleukin-10 (F), Tumour Necrosis Factor- $\alpha$  (G), D-dimer (H), and Neutrophil to Lymphocyte ratio (I). Differences between phenotypes were significant for all key variables.



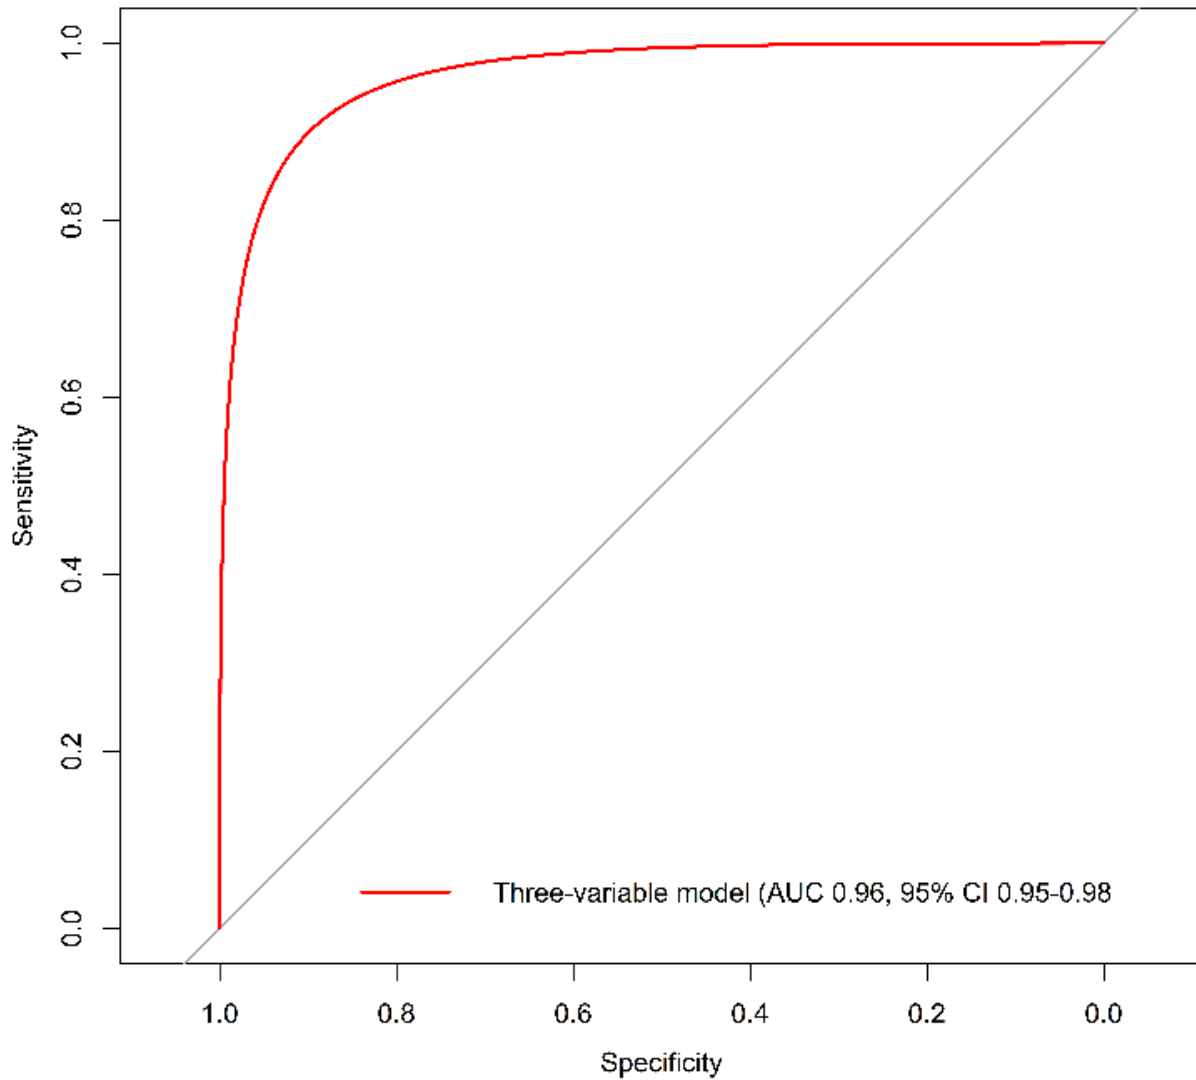

**e-Figure 5.** Receiver operating characteristic curves of the three-variable model.
